# Supplementary material for: Topotactical conversion of carbon coated Fe-based electrodes on graphene aerogels for lithium ion storage
Source: Royal Society of Chemistry journal article supplement (doi:10.1039/c5ta03605d), 2015-01-01
Supplement: c5ta03605d1.pdf [file c5ta03605d1.pdf]

## **Supporting information**

### **Topotactical Conversion of Carbon Coated Fe-based Electrodes on Graphene**

#### **Aerogels for Lithium Ion Storage**

Feiying Jin and Yong Wang\*

Department of Chemical Engineering, School of Environmental and Chemical  
Engineering, Shanghai University, Shangda Road 99, Shanghai, P. R. China, 200444

Email: [yongwang@shu.edu.cn](mailto:yongwang@shu.edu.cn)

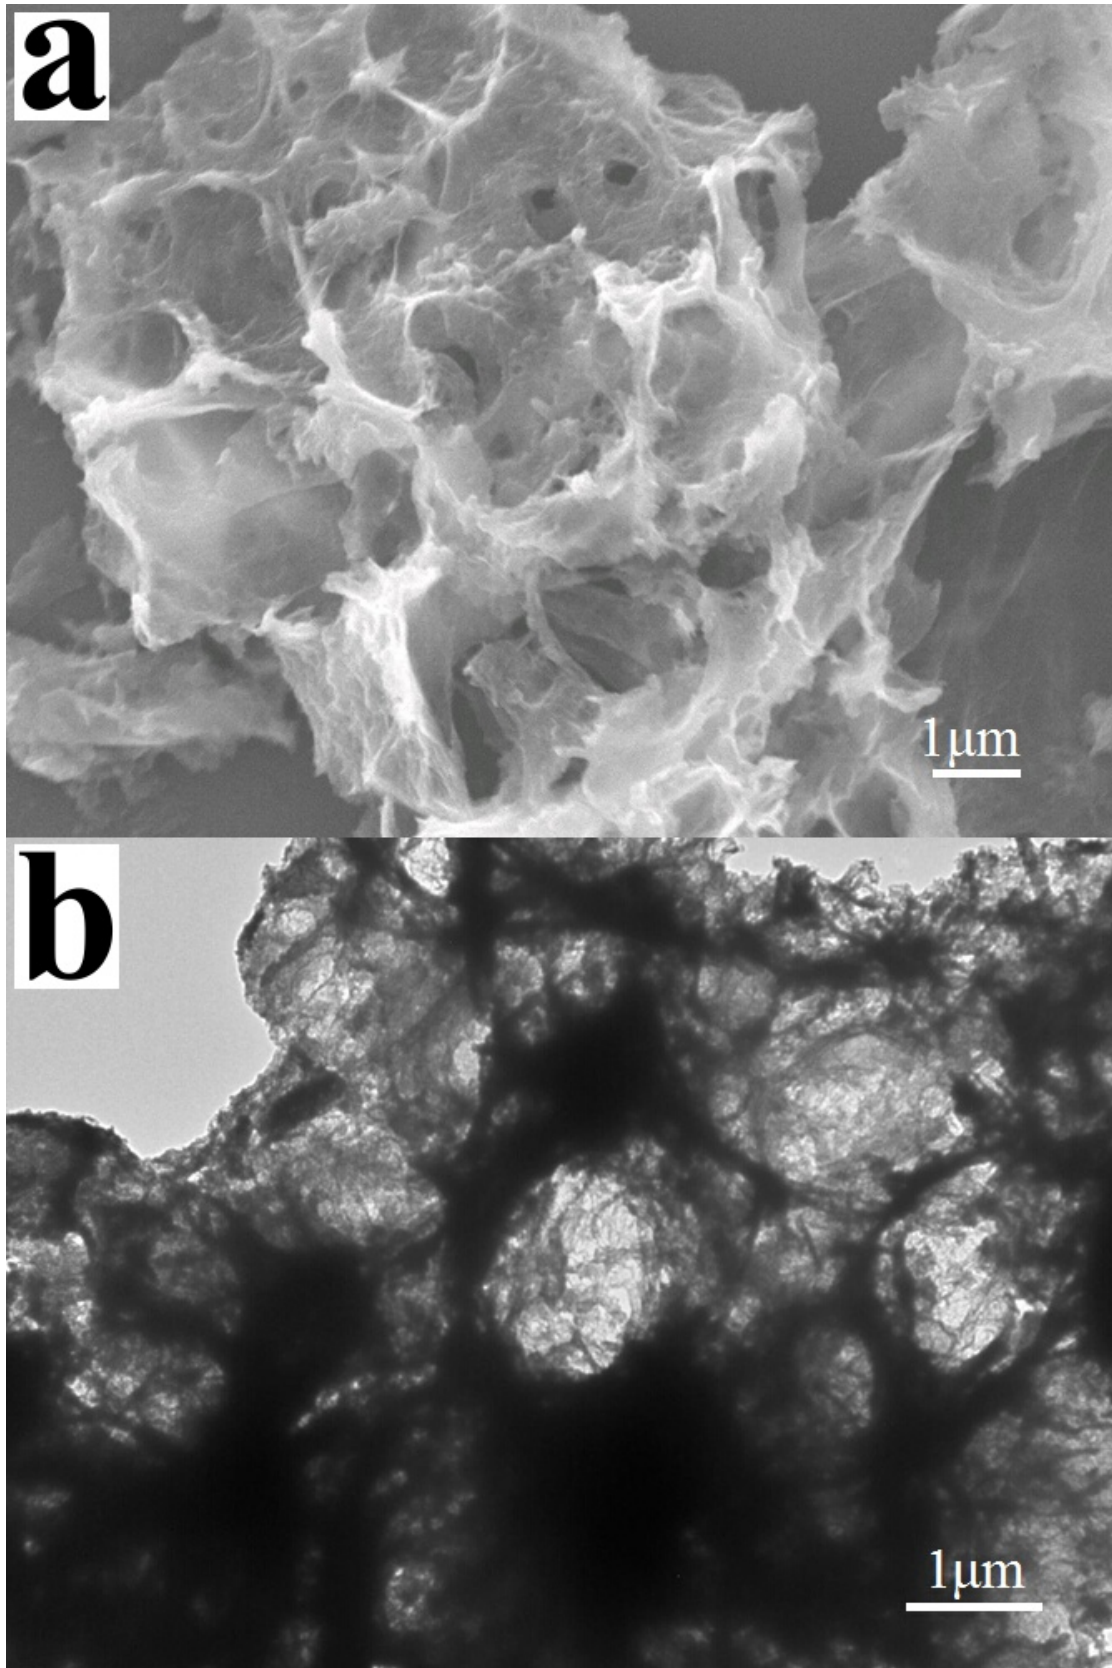

**Fig. S1** Graphene aerogels (GAs) : (a) SEM image and (b) TEM image.

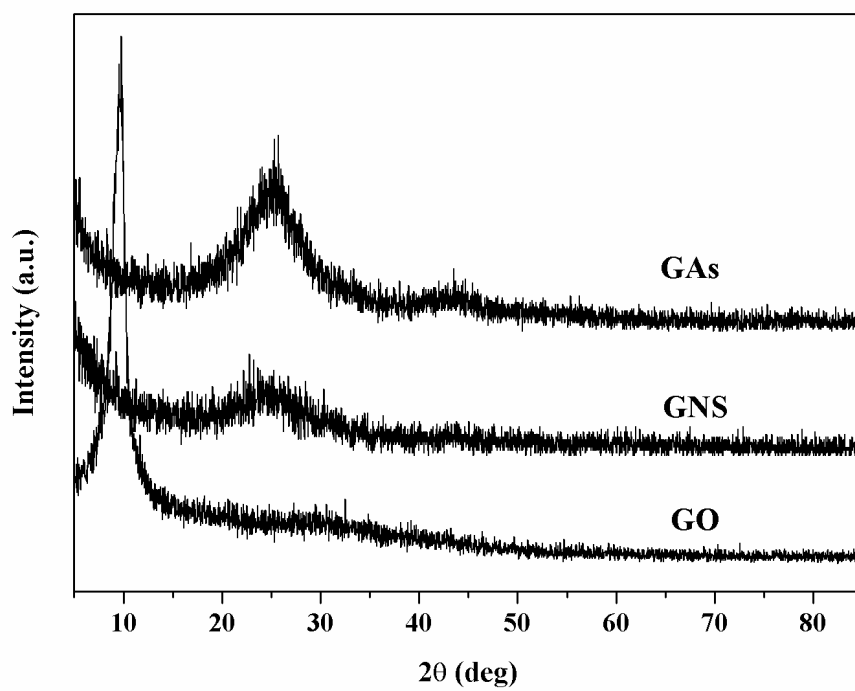

**Fig. S2** XRD patterns of graphene aerogels (GAs), graphene nanosheets (GNS) and graphene oxide (GO).

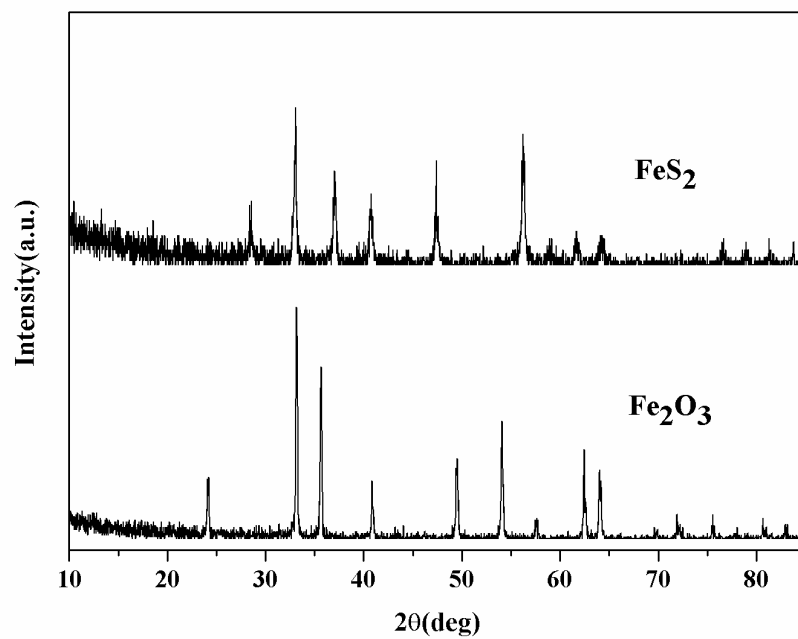

**Fig. S3** XRD patterns of pristine Fe<sub>2</sub>O<sub>3</sub> and FeS<sub>2</sub>.

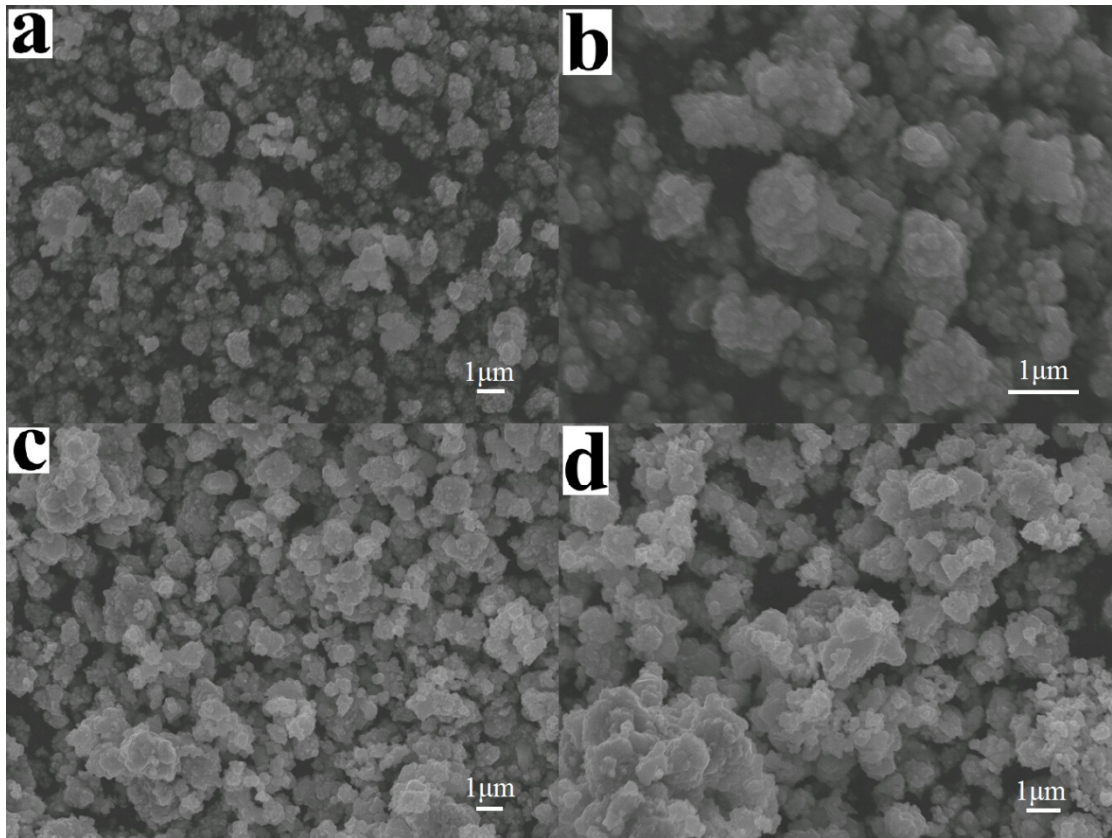

**Fig. S4** (a, b) SEM images of pristine  $\text{Fe}_2\text{O}_3$  and (c, d) SEM images of  $\text{FeS}_2$ .

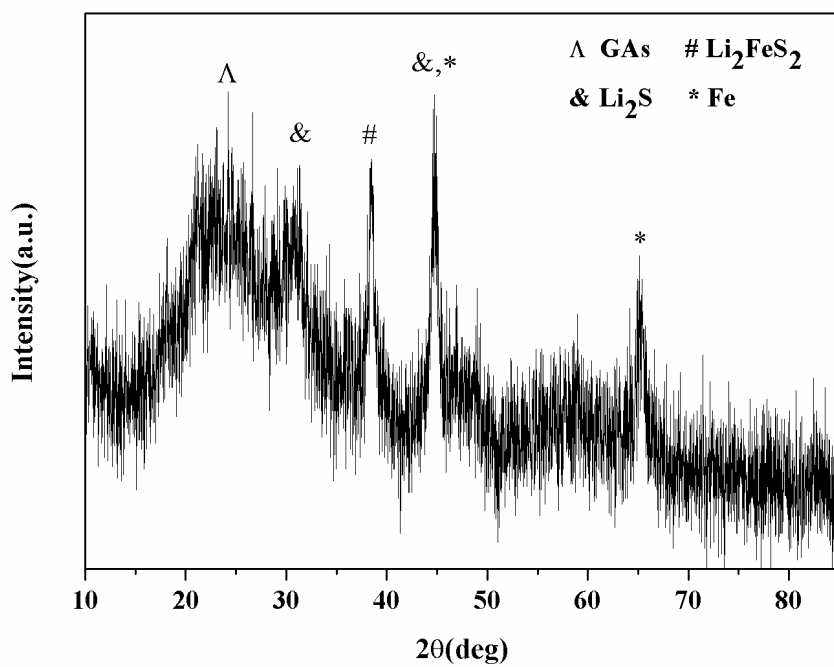

**Fig. S5** XRD patterns of the FeS<sub>2</sub>@C/S-GAs electrode, discharged at ~1.3 V after 80 cycles.

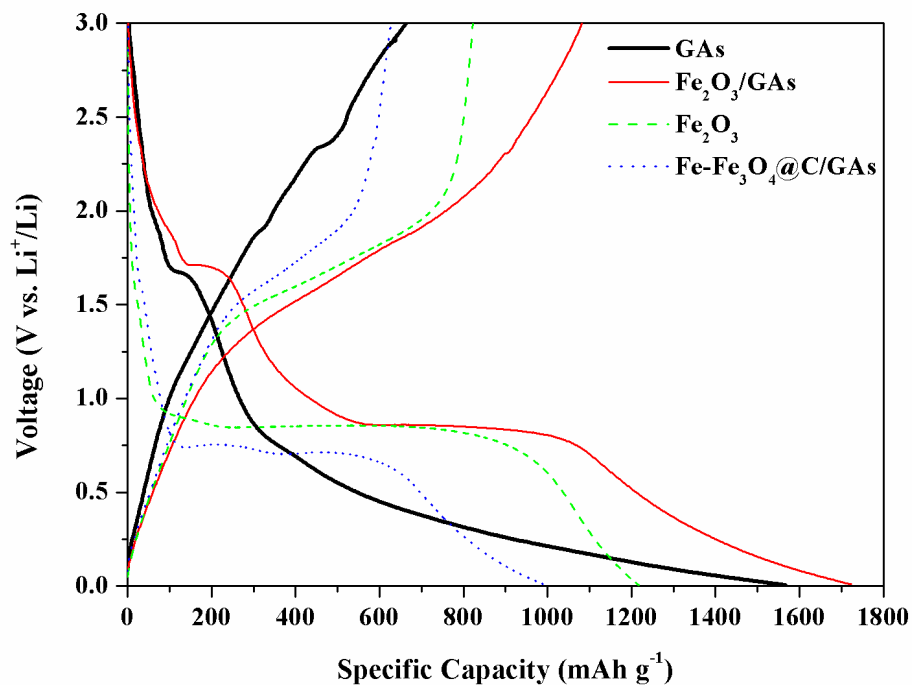

**Fig. S6** First-cycle discharge (lithium insertion) and charge (lithium extraction) curves of the GAs, Fe<sub>2</sub>O<sub>3</sub>/GAs, Fe<sub>2</sub>O<sub>3</sub>, Fe-Fe<sub>3</sub>O<sub>4</sub>@C/GAs electrodes. Initial discharge capacities of 1567.1, 1723.9, 1216.9, 995.9 mAh g<sup>-1</sup> and charge capacities of 664.1, 1082.0, 822.1, 627.4 mAh g<sup>-1</sup> are observed for the GAs, Fe<sub>2</sub>O<sub>3</sub>/GAs, Fe<sub>2</sub>O<sub>3</sub>, Fe-Fe<sub>3</sub>O<sub>4</sub>@C/GAs electrodes respectively.

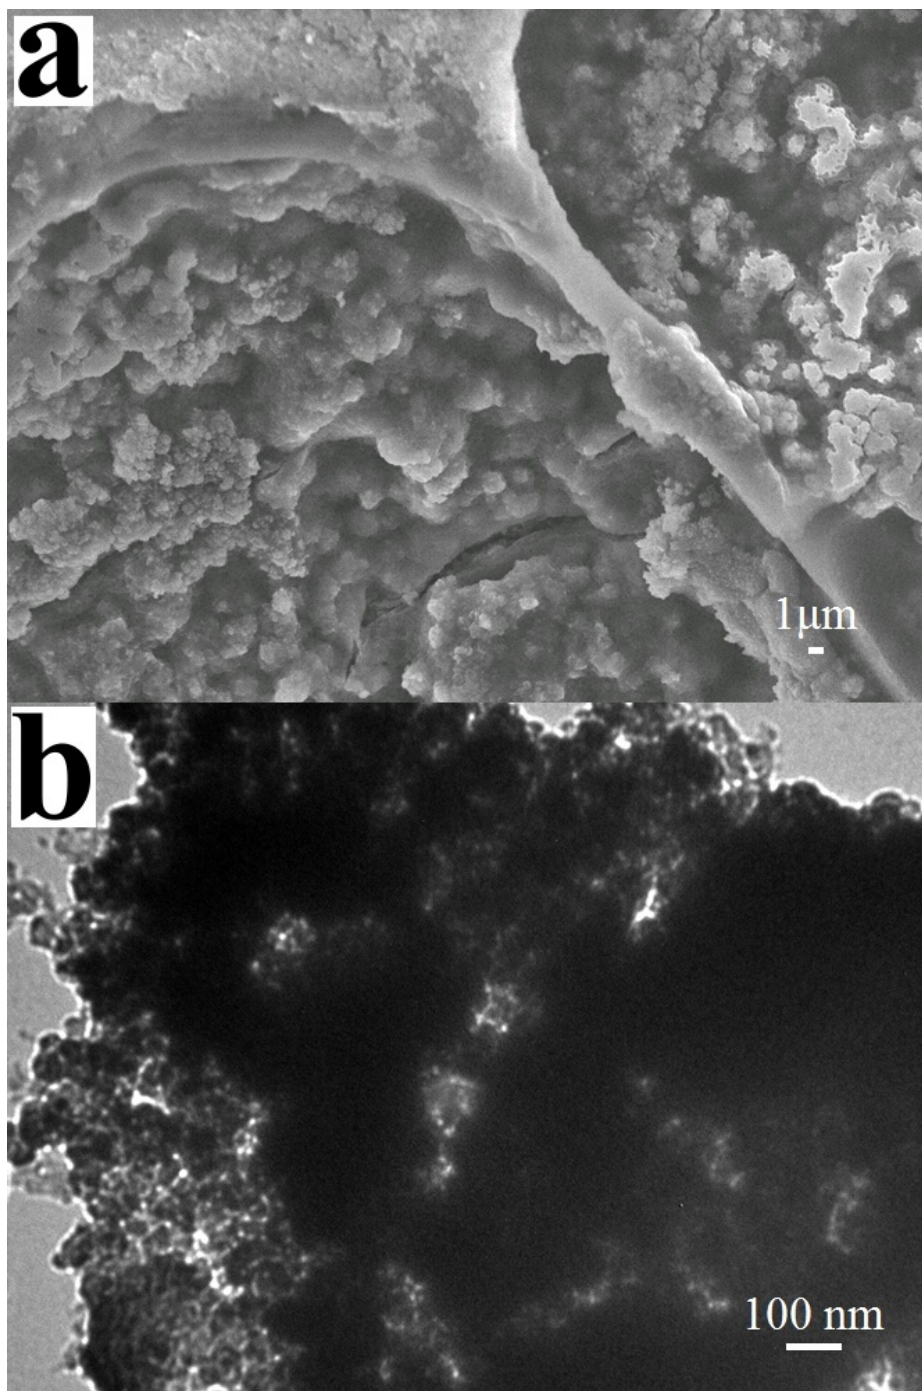

**Fig. S7** The  $\text{FeS}_2@\text{C}/\text{S-GAs}$  electrode after 80 cycles (a) SEM image and (b) TEM image. The conductive agent of carbon black and the PVDF binder are also present in the electrode.
